# Supplementary material for: Maximizing phonon scattering efficiency by Cu2Se alloying in AgCuTe thermoelectric materials
Source: Royal Society of Chemistry journal article supplement (doi:10.1039/d1ta10692a), 2022-01-01
Supplement: d1ta10692a1.pdf [file d1ta10692a1.pdf]

## Supporting Information

### Maximizing phonon scattering efficiency by Cu<sub>2</sub>Se alloying in AgCuTe thermoelectric materials

Lanwei Li<sup>a</sup>, Wenya Zhai<sup>a</sup>, Chao Wang<sup>\*a</sup>, Yanqun Chen<sup>a</sup>, Shuyao Li<sup>a</sup>, Pengya Fan<sup>a</sup>, Zhenxiang Cheng<sup>b</sup>, Gui Yang<sup>c</sup>, Jianli Wang<sup>\*a</sup>, and Yanli Mao<sup>\*d</sup>

<sup>a</sup> Institute for Computational Materials Science, School of Physics and Electronics, Henan University, Kaifeng, 475004, China

<sup>b</sup> Institute for Superconducting and Electronic Materials, University of Wollongong, Squires Way, North Wollongong, Australia.

<sup>c</sup> School of Mechanical and Electrical Engineering, Chuzhou University, Chuzhou 239000, China.

<sup>d</sup> International Joint Research Laboratory of New Energy Materials and Devices of Henan Province, Henan University, Kaifeng, 475004, China.

\* corresponding author: wangchao@vip.henu.edu.cn; jianli@uow.edu.au; ylmao@henu.edu.cn

### Results and Discussion:

#### The Lorenz number

In our work, the Lorenz number used in the calculation of  $\kappa_e$  is obtained based on the single parabolic band:

$$L = \left( \frac{k_B}{e} \right)^2 \left( \frac{(r+7/2)F_{r+5/2}(\eta)}{(r+3/2)F_{r+1/2}(\eta)} - \left[ \frac{(r+5/2)F_{r+3/2}(\eta)}{(r+3/2)F_{r+1/2}(\eta)} \right]^2 \right) \quad (1)$$

In the above equation,  $F_n(\eta)$  is defined as

$$F_n(\eta) = \int_0^\infty \frac{\chi^n}{1+e^{\chi-\eta}} d\chi \quad (2)$$

$$\eta = \frac{E_f}{k_B T} \quad (3)$$

Where  $F_n(\eta)$  is the n-order Fermi integral, and  $\eta$  is called the reduced Fermi energy.  $\eta$  can be obtained by the following formula:

$$S = \pm \frac{k_B}{e} \left( \frac{(r+5/2)F_{r+3/2}(\eta)}{(r+3/2)F_{r+1/2}(\eta)} - \eta \right) \quad (4)$$

In the above equation,  $\eta$  can be obtained by the measured Seebeck coefficients. The scattering factor  $r$  is  $-1/2$  in acoustic phonon scattering.

### The modified Cahill's model calculation

For AgCuTe, it is widely accepted that the transverse component of sound velocity is reduced or completely vanished at higher temperature due to its liquid-like behavior<sup>1,2,3</sup>. Because AgCuTe is a liquid-like material, the modified Cahill's model is used to calculate the minimum lattice thermal conductivity<sup>4</sup>:

$$\kappa_{\min} = \frac{1}{2} \left( \frac{\pi}{6} \right)^{1/3} \kappa_B V^{-2/3} (v_1) \quad (1)$$

where  $\kappa_B$  is the Boltzmann constant,  $V$  is the average volume per atom and  $v_1$  is the longitudinal sound velocity. The  $v_1$  can be calculated by<sup>5</sup>

$$v_1 = \sqrt{\frac{B + 4/3G}{\rho}} \quad (2)$$

Where  $B$  is the bulk modulus,  $G$  is the shear modulus and  $\rho$  is the density of a compound. Based on statistical-learning prediction of the bulk and shear modulus of cubic AgCuTe in the materials project<sup>6</sup>, we get that  $B$  is 57.3 and  $G$  is 23.6. Therefore, the minimum lattice thermal conductivity was calculated to be  $\sim 0.21 \text{ Wm}^{-1}\text{K}^{-1}$  for AgCuTe.

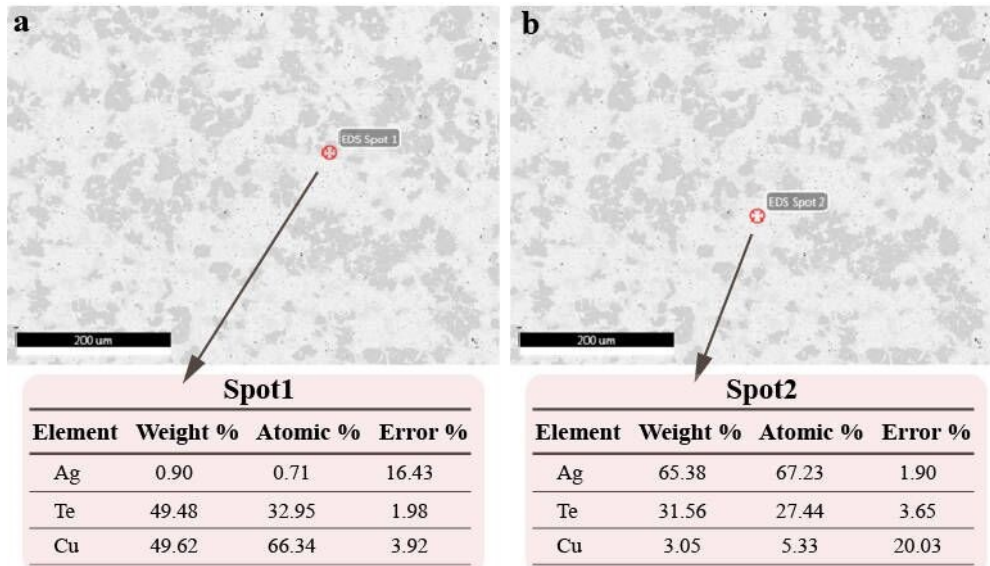

**Fig. S1** The percentage diagram of the EDS element content of the secondary phase in AgCuTe-1%Cu<sub>2</sub>Se.

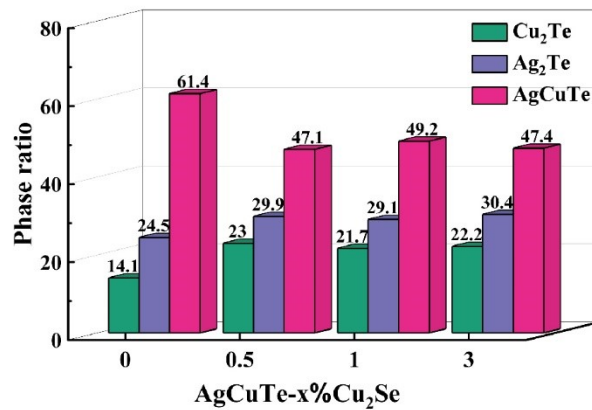

**Fig. S2** The calculation results of the phases content in the AgCuTe - x%Cu<sub>2</sub>Se (x = 0, 0.5, 1 and 3) sample.

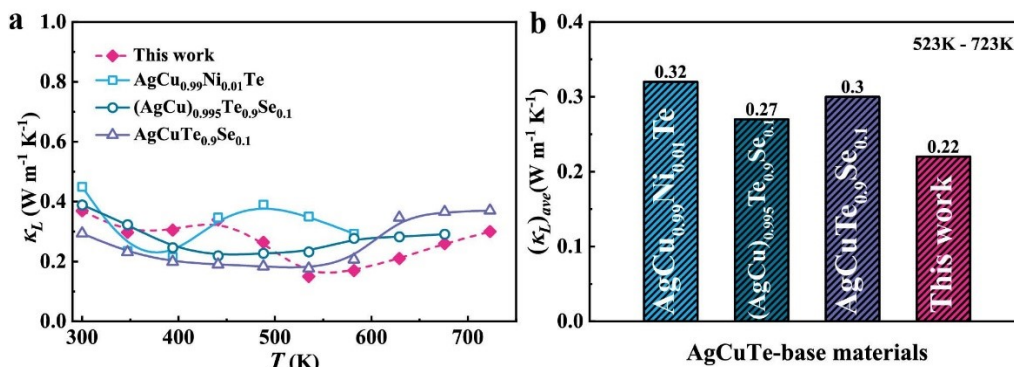

**Fig. S3** a) Comparison of lattice thermal conductivity ( $\kappa_L$ ) as a function of temperature in AgCuTe-based materials<sup>7,8,9</sup>; b) comparison of temperature-dependent average  $\kappa_L$  value in AgCuTe-based materials. Among them, due to the lower test temperature of AgCu<sub>0.99</sub>Ni<sub>0.01</sub>Te<sup>7</sup>, it only calculated the average  $\kappa_L$  from 523 K to 582 K.

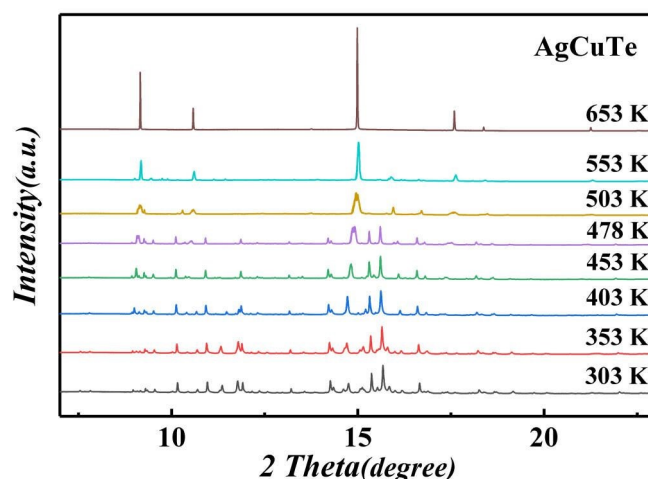

**Fig. S4** Synchrotron powder diffraction (SPD) patterns of AgCuTe collected with the temperature increasing from 303 K to 653 K.

## References

- 1、 Kim, H.; Ballikaya, S.; Chi, H.; Ahn, J.-P.; Ahn, K.; Uher, C.; Kaviany, M., Ultralow thermal conductivity of Cu<sub>2</sub>Se by atomic fluidity and structure distortion. *Acta Mater.* **2015**, 86 (0), 247-253.
- 2、 Zhao, L.; Wang, X.; Wang, J.; Cheng, Z.; Dou, S.; Wang, J.; Liu, L., Superior intrinsic thermoelectric performance with ZT of 1.8 in single-crystal and melt quenched highly dense Cu<sub>2-x</sub>Se bulks. *Sci. Rep.* **2015**, 5, 7671.
- 3、 Chatov, V., Ionic conduction and diffusion of copper in copper selenide. *Sov. Phys. Semicond.* **1980**, 14 (4), 474-475.
- 4、 Butt, S.; Xu, W.; Farooq, M. U.; Ren, G. K.; Zhang, Q.; Zhu, Y.; Khan, S. U. and others, Enhanced thermoelectricity in high-temperature  $\beta$ -phase copper (I) selenides embedded with Cu<sub>2</sub>Te nanoclusters. *ACS Appl. Mater. Interfaces.* **2016**, 8, 15196-15204.
- 5、 Jia, T.; Chen, G.; Zhang, Y., Lattice thermal conductivity evaluated using elastic properties. *Phys. Rev. B.* **2017**, 95(15), 155206.
- 6、 de Jong, M.; Chen, W.; Notestine, R.; Persson, K.; Ceder, G.; Jain, A.; Asta, M.; Gamst A, A., Statistical learning framework for materials science: Application to elastic moduli of k-nary inorganic polycrystalline compounds. *Sci. Rep.* **2016**, 6, 34256.
- 7、 Zhang, B.; Yang, H.; Tian, Z.; Wang, J., Effect of Ni doping on thermoelectric properties of Ag<sub>2</sub>Te-Cu<sub>2</sub>Te composite material. *J. Alloy. Compd.* **2021**, 870, 159425.
- 8、 Jiang, J.; Zhu, H.; Niu, Y.; Zhu, Q.; Song, S.; Zhou, T.; Wang, C.; Ren, Z., Achieving high room-temperature thermoelectric performance in cubic AgCuTe. *J. Mater. Chem. A.* **2020**, 8, 4790-4799.
- 9、 Deng, S.; Jiang, X.; Chen, L.; Qi, N.; Tang, X.; Chen, Z., Ultralow thermal conductivity and high thermoelectric performance in AgCuTe<sub>1-x</sub>Se<sub>x</sub> through Isoelectronic Substitution. *ACS Appl. Mater. Interfaces.* **2021**, 13, 868-877.
